# Supplementary material for: Economic Evaluation of Implementing SD Biosensor Antigen Detecting SARS-COV-2 Rapid Diagnostic Tests in Kenya
Source: Research Square preprint supplement (doi:10.21203/rs.3.rs-6854403/v1), 2025-06-16
Supplement: Supplementary file 1 [file 5331f835ebcc9984ee444870.docx]

**Additional file 1:**

**Ag-RDT TEST**

| **Consumable** | | | | | | |
| --- | --- | --- | --- | --- | --- | --- |
| **List** | | **The base unit of measurement** | | **Item unit cost** | | **Source** |
| SD Biosensor covid kit | | Box of 25 | | 7.11 | | Market price from major distributors in Kenya |
| **PPE** | | | | | | |
| **List** | | **Days in use before disposal** | | **The quantity used by a healthcare worker per shift** | | **Source** |
| Gown | | 1 day | | 1 | | Primary data collected from COVID-19 testing facilities |
| Face mask N95 Mask | | 1 day | | 1 | |
| Goggles | | 1 day | | 1 | |
| Gloves (50 pairs) | | 1 day | | 4 | |
| Hand sanitizers (500ml) | | 1 day | | 0.01 | |
| Liquid soaps (500ml) | | 1 day | | 0.0125 | |
| Bin liners | | 1 day | | 1 | |
| **Staff** | | | | | | |
| **Staff category** | **Staff-to-test ratio** | | **Shift duration** | | **Source** | |
| Medical lab officers | 1:10 | | Two 8-hour day shift | | Primary data collected from COVID-19 testing facilities | |
| **Physical & Overhead Costs** | | | | | | |
| **List** | | **Description** | | **Annualized cost** | | **Source** |
| Building | | 5 square meters | | 1184.91 | | Primary data collected from COVID-19 testing facilities |
| **Other Expenditure** | | | | | | |
| Electricity | |  | | 973.11 | | Primary data collected from COVID-19 testing facilities and [Examining unit costs for COVID-19 case management in Kenya](https://www.ncbi.nlm.nih.gov/pmc/articles/PMC8053308/) |
| Water | |  | | 162.18 | |
| Repair & Maintenance | |  | | 531.97 | |
| Admin. & General Expenditure | |  | | 1005.55 | |
| Cleaning services | |  | | 1297.48 | |
| Incinerator | |  | | 324.37 | |
| Catering services | |  | | 4865.54 | |

**PCR TEST**

| **Equipment per site** | | | | | | |
| --- | --- | --- | --- | --- | --- | --- |
| **List** | | **Quantity** | | **Annualized cost** | | **source** |
| Multi-channel pipette 20-200 m liter | | 1 | | 258.06 | | [Examining unit costs for COVID-19 case management in Kenya](https://www.ncbi.nlm.nih.gov/pmc/articles/PMC8053308/) |
| Vacuum fold | | 1 | | 1,032.26 | |
| Mini Spin | | 1 | | 219.35 | |
| PCR Chambers | | 1 | | 1,290.32 | |
| Refrigerator/freezer -20 CModel MPR-414 F Panasonic | | 1 | | 1,548.39 | |
| Vortex Machine 0-3000 RPM 220v, Velp Italy | | 1 | | 129.03 | |
| Refrigerated Centrifuge Machine Temperature Range -20 to +40 Model Z 326 K, Hermle IEC 1010 | | 1 | | 1,935.48 | |
| UPS 6 KVA APC Smart-UPS RVA 6000 VA 230 V | | 1 | | 774.19 | |
| Hands sanitizers Dispensers | | 1 | | 2.06 | |
| **Lab PPE** | | | | | | |
| **List** | | **Quantity** | | **Unit cost** | | **Source** |
| Tyvek Suits | | 1 day | | 19.35 | | [Examining unit costs for COVID-19 case management in Kenya](https://www.ncbi.nlm.nih.gov/pmc/articles/PMC8053308/) |
| N-95 | | 1 day | | 19.35 | |
| Biohazard Bags (18 Litters) | | 1 day | | 0.26 | |
| PAPR (Powered Air purifying respirators) | |  | | 1290.32 | |
| Hand sanitizers (1 litter bottle) | | 1 day | | 19.35 | |
| **List** | | **The base unit of measurement** | | **Unit cost** | | **Source** |
| Safety Consumables | | PACK OF 200 | | 934.88 | | [Examining unit costs for COVID-19 case management in Kenya](https://www.ncbi.nlm.nih.gov/pmc/articles/PMC8053308/) |
| Plasticware | | Pack 10 X 96 | | 4,764.89 | |
| Plasticware | | Pack 10 X 96 | | 4,764.89 | |
| SAMPLE STORAGE | | PACK OF 500 | | 31.65 | |
| SAMPLE STORAGE | | BOX OF 500 | | 562.27 | |
| SAMPLE COLLECTION | | Pack of 100 | | 107.73 | |
| SAMPLE COLLECTION | | pcs | | 438.90 | |
| Laboratory chemicals | | 250 | | 764.29 | |
| consumables | | 10ml | | 2432.43 | |
| Laboratory chemicals | | Base | | 24.2 | |
| Laboratory chemicals | | Base | | 28.6 | |
| Laboratory chemicals | | Each | | 227.5 | |
| Laboratory chemicals | | Base | | 28.6 | |
| Laboratory chemicals | | Base | | 24.2 | |
| Laboratory chemicals | | Each | | 227.5 | |
| plasticware | | Pack of 20 | | 1816.8 | |
| **Staff** | | | | | | |
| **Staff category** | **Staff to test ratio** | | **Shift duration** | | **Source** | |
| Nurse | 1:5 | | Two 6-hour day shifts | | [Examining unit costs for COVID-19 case management in Kenya](https://www.ncbi.nlm.nih.gov/pmc/articles/PMC8053308/) | |
| Lab technician | 1:20 | | Two 6-hour day shifts | |
| **Physical & Overhead Costs** | | | | | | |
| **List** | | **Description** | | **Annualized cost** | | **Source** |
| Building | |  | | 21505.37 | | [Examining unit costs for COVID-19 case management in Kenya](https://www.ncbi.nlm.nih.gov/pmc/articles/PMC8053308/) |
| **Other Expenditure** | | | | | | |
| Electricity | |  | | 973.11 | | Primary data collected from COVID-19 testing facilities and [Examining unit costs for COVID-19 case management in Kenya](https://www.ncbi.nlm.nih.gov/pmc/articles/PMC8053308/) |
| Water | |  | | 162.18 | |
| Repair & Maintenance | |  | | 531.97 | |
| Admin. & General Expenditure | |  | | 1005.55 | |
| Cleaning services | |  | | 1297.48 | |
| Incinerator | |  | | 324.37 | |
| Catering services | |  | | 4865.54 | |

**Clinical Diagnosis**

| **Staff** | | | |
| --- | --- | --- | --- |
| **Staff category** | **Staff to test ratio** | **Shift duration** | **Source** |
| Nurse | 1:10 | Two 8-hour day shift | Primary data collected from COVID-19 testing facilities |
| **Physical & Overhead Costs** | | | |
| **List** | **Description** | **Annualized cost** | **Source** |
| Building | 5 square meters | 1184.91 | Primary data collected from COVID-19 testing facilities |
| **Other Expenditure** | | | |
| Electricity |  | 973.11 | Primary data collected from COVID-19 testing facilities and [Examining unit costs for COVID-19 case management in Kenya](https://www.ncbi.nlm.nih.gov/pmc/articles/PMC8053308/) |
| Water |  | 162.18 |
| Repair & Maintenance |  | 531.97 |
| Admin. & General Expenditure |  | 1005.55 |
| Cleaning services |  | 1297.48 |
| Incinerator |  | 324.37 |
| Catering services |  | 4865.54 |

**Assumptions**

| **Economic assumptions** | **Estimate** |  |
| --- | --- | --- |
| Exchange rate (US Dollar to KES) | 112.526 | <https://www.xe.com/currencyconverter/convert/?Amount=1&From=USD&To=KES> |
| Exchange rate (GBP to KES) | 153.203 | https://www.xe.com/currencyconverter/convert/?Amount=1&From=GBP&To=KES |
| Working days per year | 365 |  |
| Working hours per day | 8 |  |
| Number of mins per hour | 60 |  |
| Unemployment rate | 6.60% | <https://www.statista.com/statistics/1134370/unemployment-rate-in-kenya/> |
| Labor force participation | 71.40% | <https://www.ceicdata.com/en/indicator/kenya/labour-force-participation-rate> |
| Gross hourly wage rate |  | <https://africapay.org/kenya/salary/minimum-wages/2182-cities-nairobi-mombasa-and-kisumu> |
| Overheads | Overhead costs for Covid-19 testing accounted for 2% of the overall costs incurred in the laboratory costs | |
